# Supplementary material for: A robust Pax7EGFP mouse that enables the visualization of dynamic behaviors of muscle stem cells
Source: PubMed Central journal article supplement (PMC6107960; doi:10.1186/s13395-018-0169-7), 2018-08-24

Figure S7

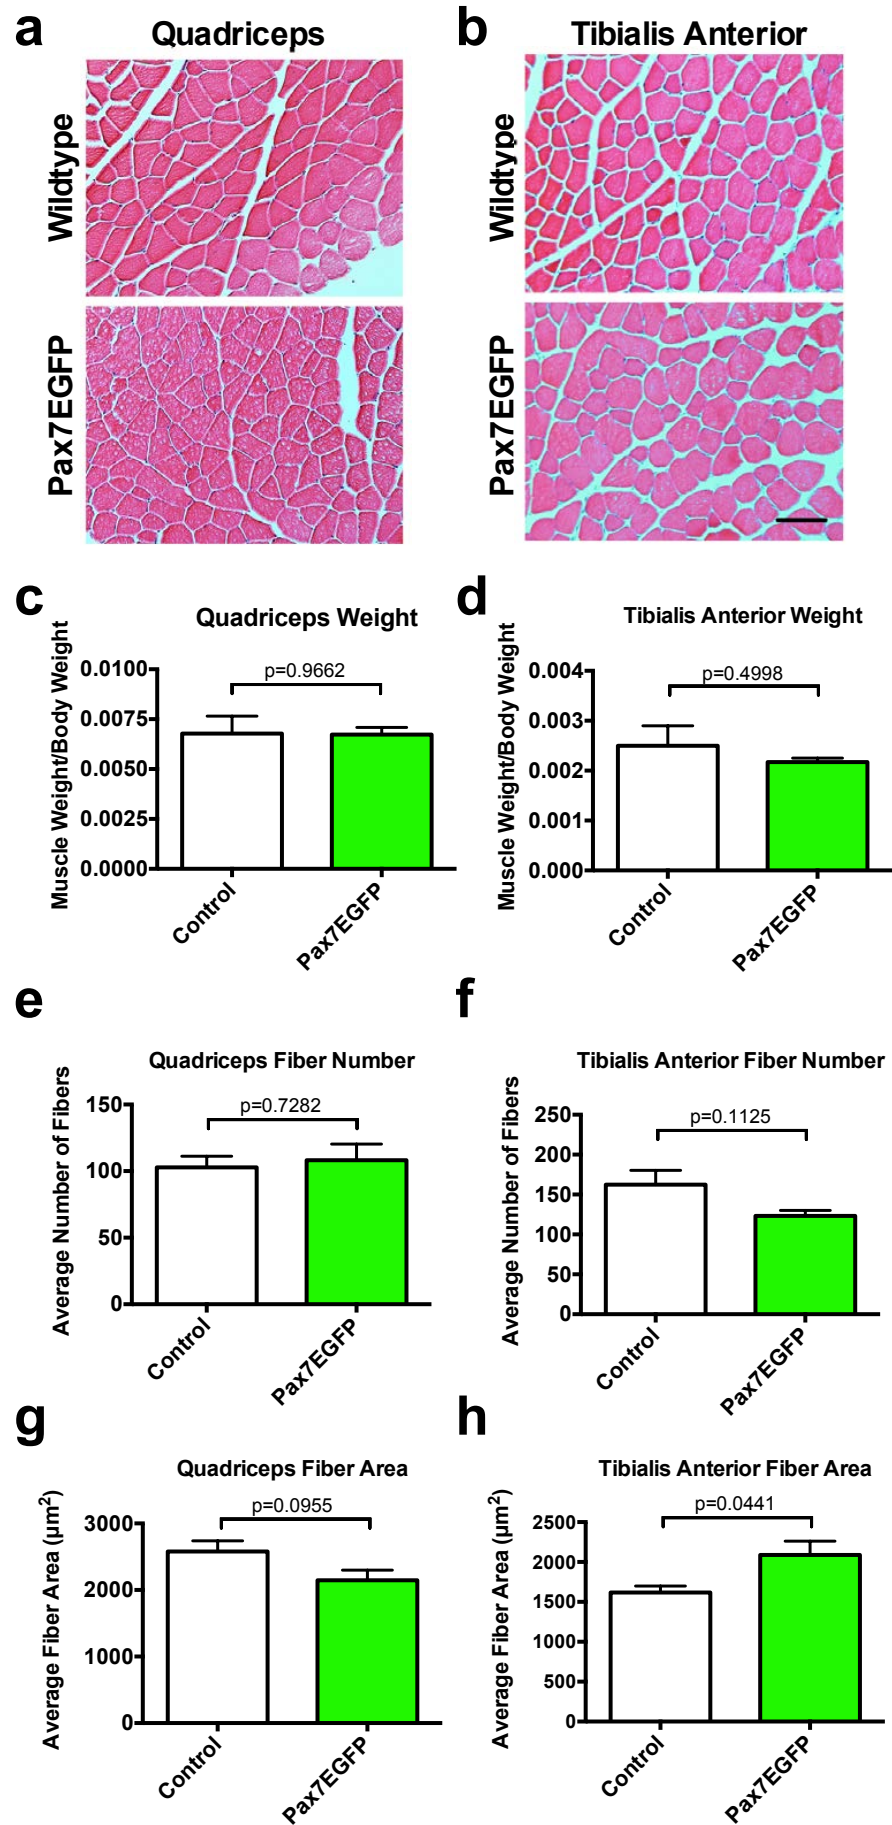

Supplement: 13395_2018_169_MOESM8_ESM.pdf [file 13395_2018_169_MOESM8_ESM.pdf]
